# Supplementary material for: Assessing the relative importance of vitamin D deficiency in cardiovascular health
Source: PubMed Central journal article supplement (PMC11521893; doi:10.3389/fcvm.2024.1435738), 2024-10-16
Supplement: Datasheet1.pdf [file Datasheet1.pdf]

# Supplementary Material

## FIGURES

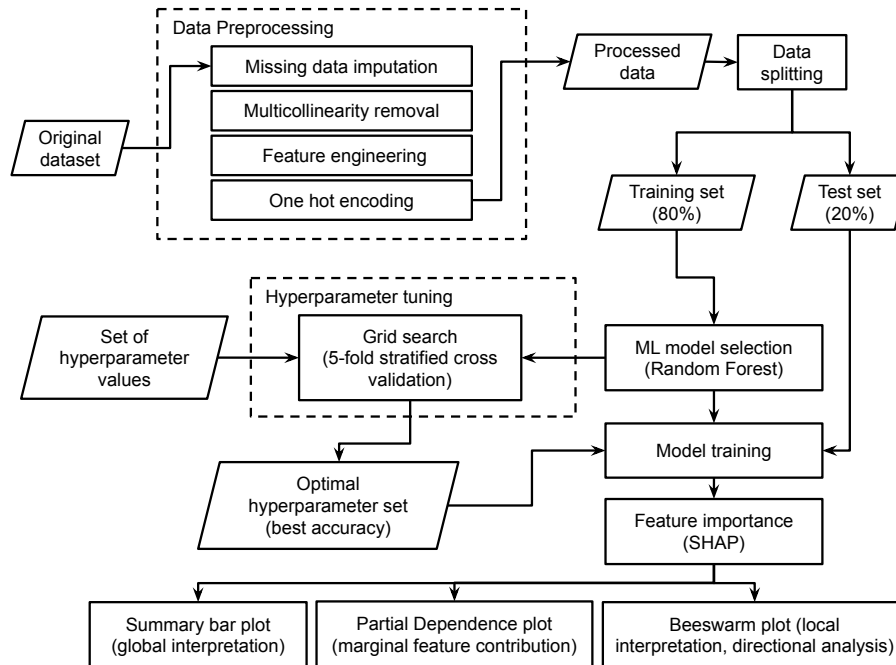

**Figure S1.**

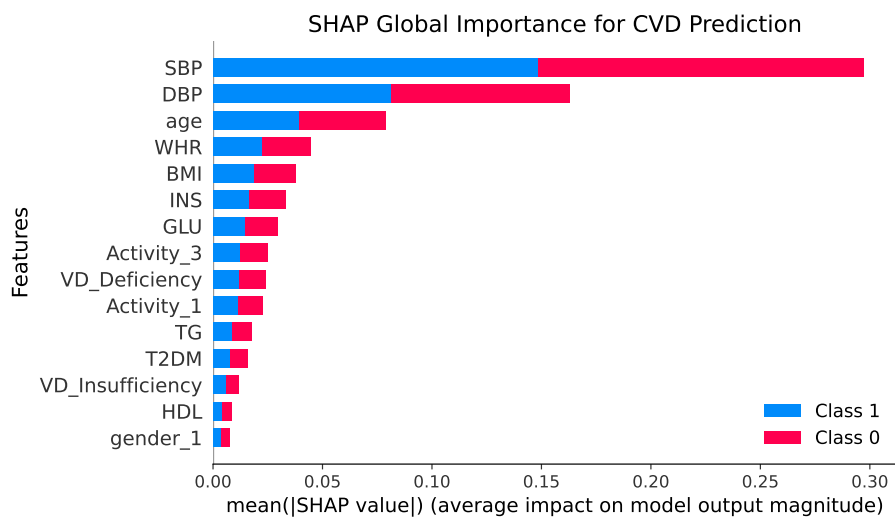

**Figure S2.**

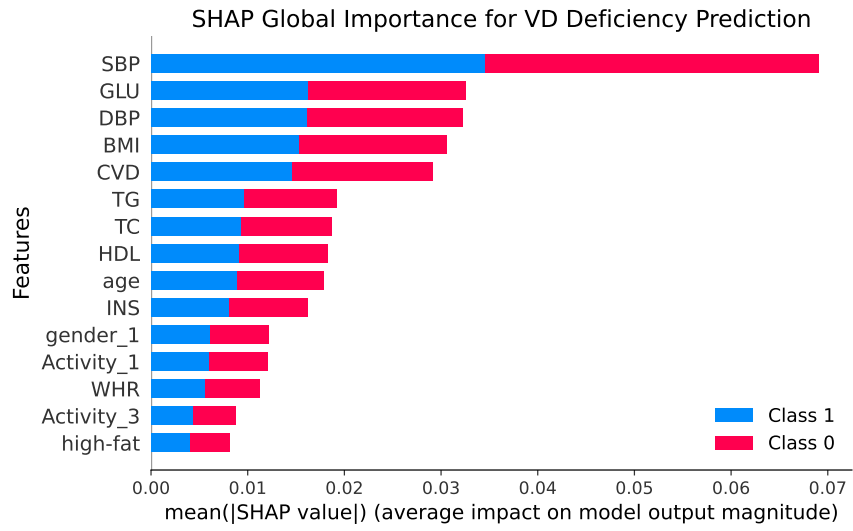

Figure S3.

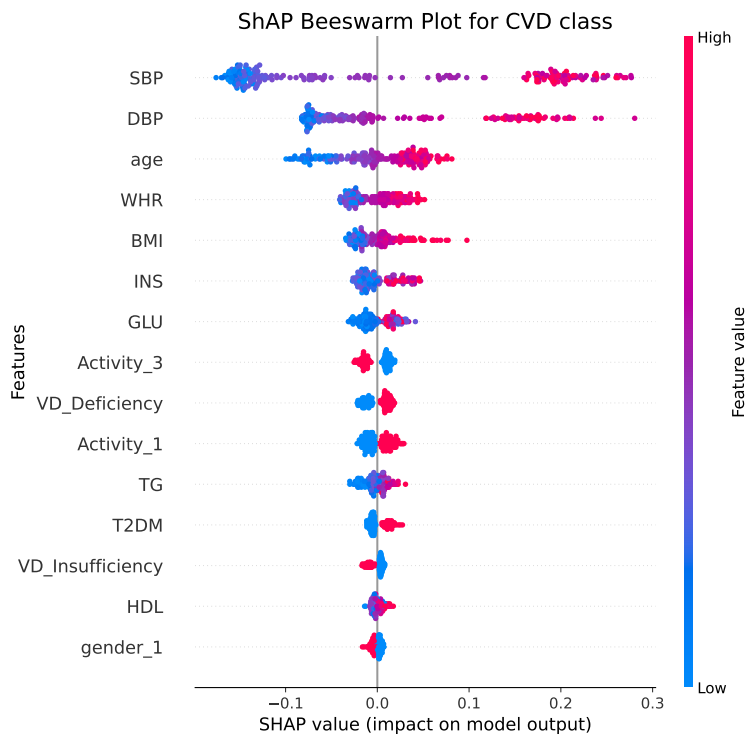

Figure S4.

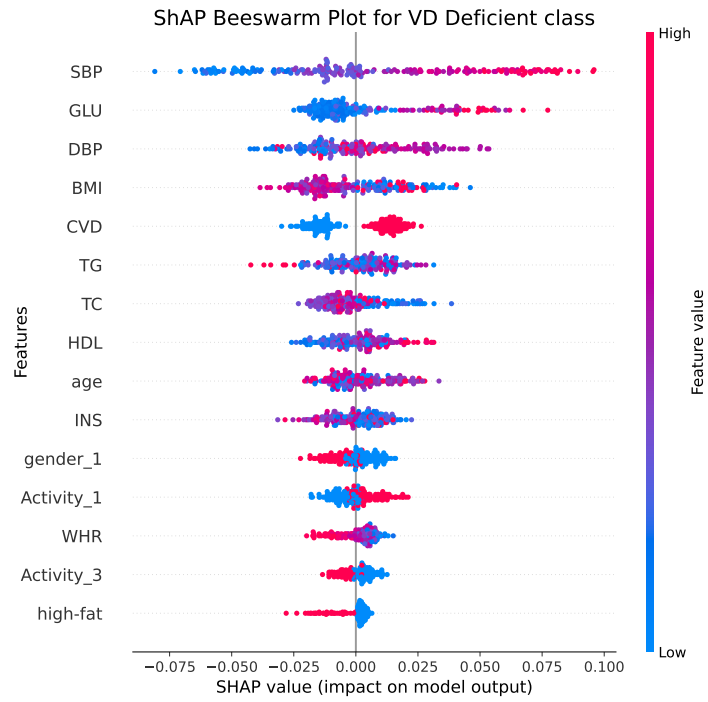

Figure S5.

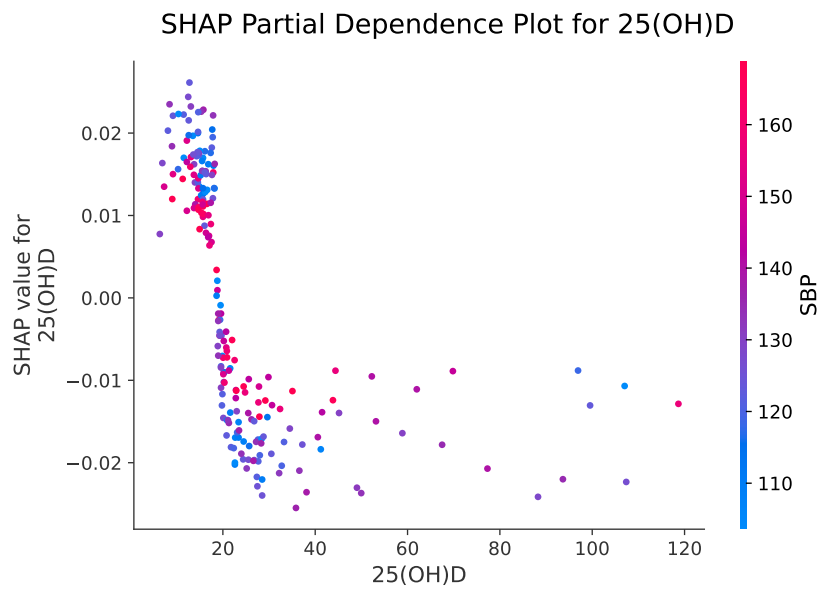

Figure S6.
